# Supplementary material for: On the survival of 48 h Plasmodium vivax Aotus monkey-derived ex vivo cultures: the role of leucocytes filtration and chemically defined lipid concentrate media supplementation
Source: PubMed Central journal article supplement (PMC7398384; doi:10.1186/s12936-020-03348-9), 2020-08-03

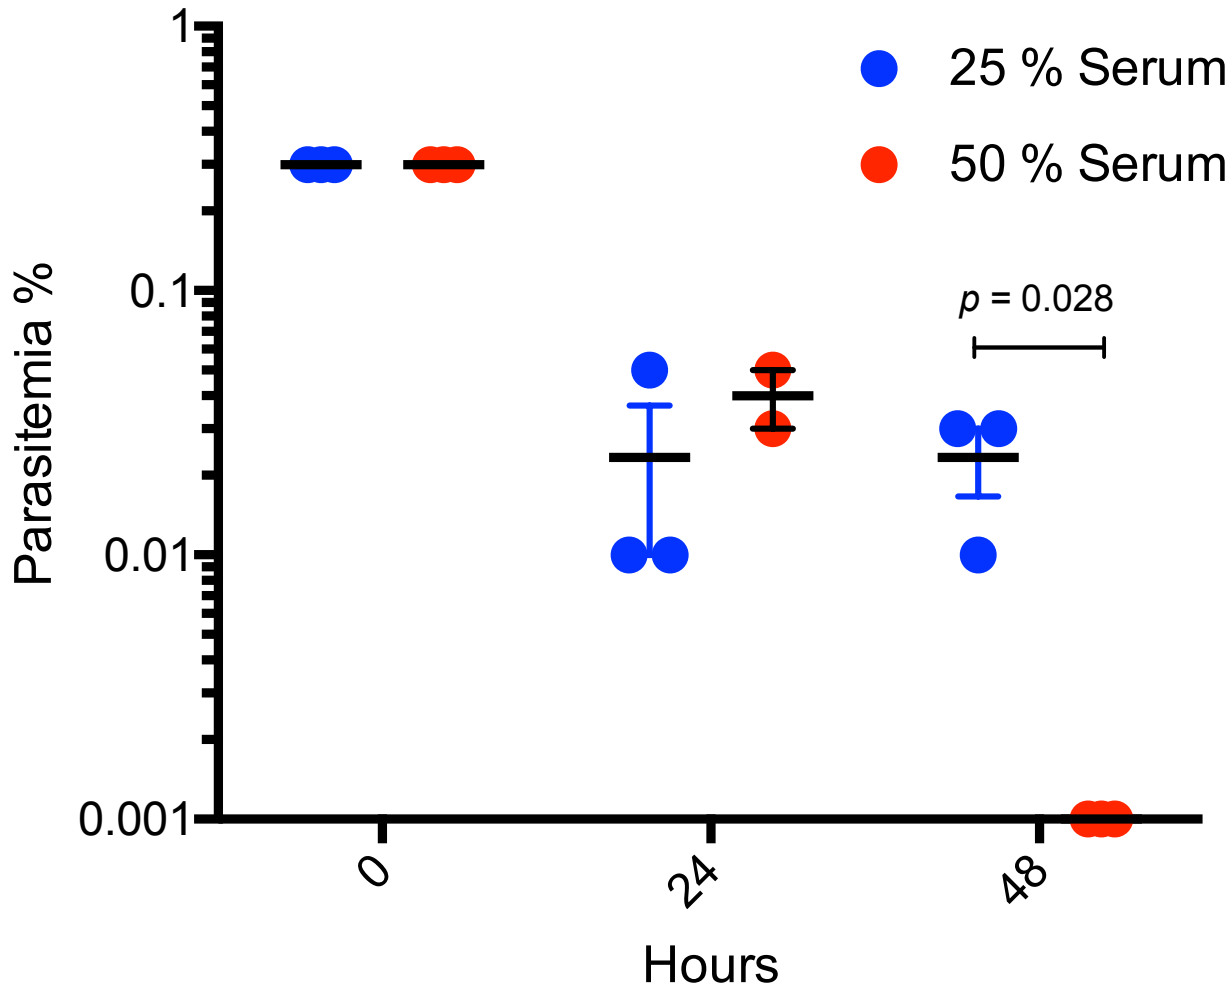

Supplement: 12936_2020_3348_MOESM2_ESM.pdf [file 12936_2020_3348_MOESM2_ESM.pdf]
